# Supplementary material for: The electronic structure, surface properties, and in situ N2O decomposition of mechanochemically synthesised LaMnO3
Source: Royal Society of Chemistry journal article supplement (doi:10.1039/d0cp00793e), 2020-01-01
Supplement: d0cp00793e1.pdf [file d0cp00793e1.pdf]

## Electronic Supplementary Information

### The electronic structure and surface properties of mechanochemically synthesised $\text{LaMnO}_3$ during *in situ* $\text{N}_2\text{O}$ decomposition

Rachel H. Blackmore,<sup>†‡</sup> Maria Elena Rivas,<sup>§</sup> George Tierney,<sup>†‡</sup> Khaled M. H. Mohammed,<sup>##</sup> Donato Decarolis,<sup>†‡</sup> Shusaku Hayama,<sup>⊥</sup> Federica Venturini,<sup>⊥</sup> Georg Held,<sup>⊥</sup> Rosa Arrigo,<sup>⊥</sup> Monica Amboage,<sup>⊥</sup> Pip Hellier,<sup>†‡</sup> Evan Lynch,<sup>†‡</sup> Mahrez Amri,<sup>§</sup> Marianna Casavola,<sup>‡</sup> Tugce Eralp Erden,<sup>§</sup> Paul Collier<sup>§</sup> and Peter P. Wells<sup>†‡,⊥\*</sup>

<sup>†</sup> UK Catalysis Hub, Research Complex at Harwell, Rutherford Appleton Laboratories, Harwell Science & Innovation Campus, Didcot, Oxfordshire. OX11 0FA, UK

<sup>‡</sup> School of Chemistry, University of Southampton, Southampton. SO17 1BJ, UK

<sup>§</sup> Johnson Matthey Technology Centre, Blounts Court Road, Sonning Common, Reading. RG4 9NH, UK

<sup>##</sup> Department of Chemistry, Faculty of Science, Sohag University, Sohag, P.O.Box 82524, Egypt.

<sup>⊥</sup> School of Chemistry, Cardiff University, Main Building, Park Place, Cardiff. CF10 3AT, UK

<sup>⊥</sup> Diamond Light Source Ltd., Harwell Science & Innovation Campus, Didcot, Oxfordshire. OX11 0FA, UK

\* Electronic Supplementary Information (ESI) available.

See DOI:

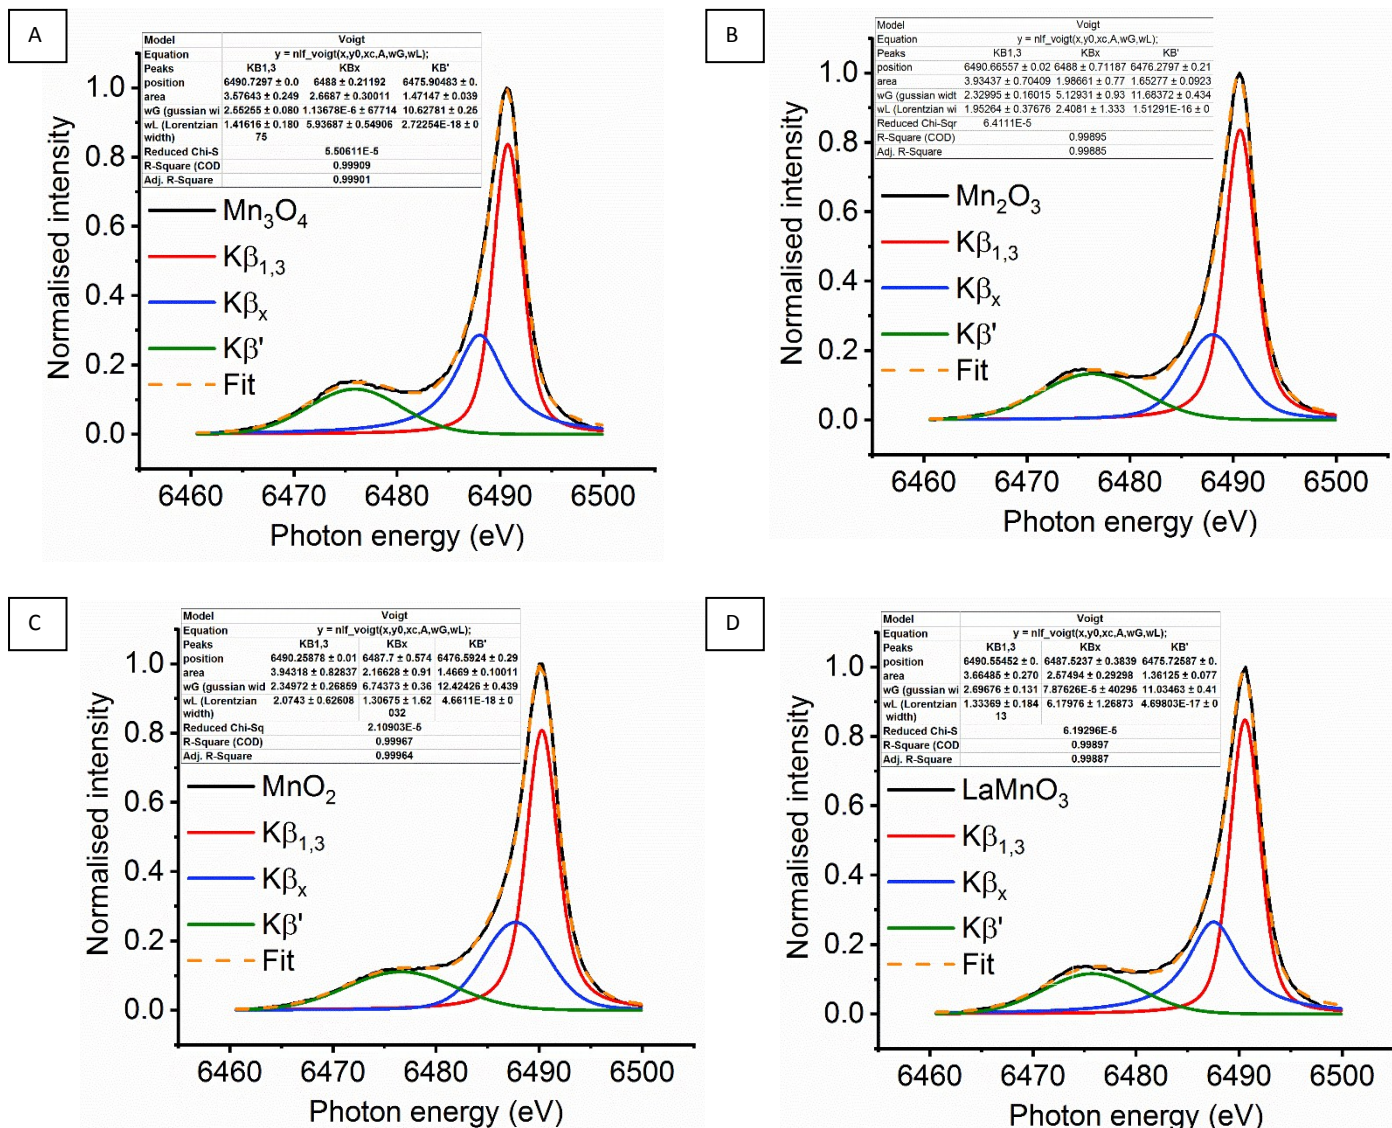

**Figure S1:** Mn  $\text{K}\beta$  mainlines fitted using three symmetric Voigt curves ( $\text{K}\beta_{1,3}$ ,  $\text{K}\beta'$  and  $\text{K}\beta_x$ ) for Mn reference materials (A)  $\text{Mn}_3\text{O}_4$  (B)  $\text{Mn}_2\text{O}_3$  (C)  $\text{MnO}_2$  compared to (D) sol-gel synthesised  $\text{LaMnO}_3$

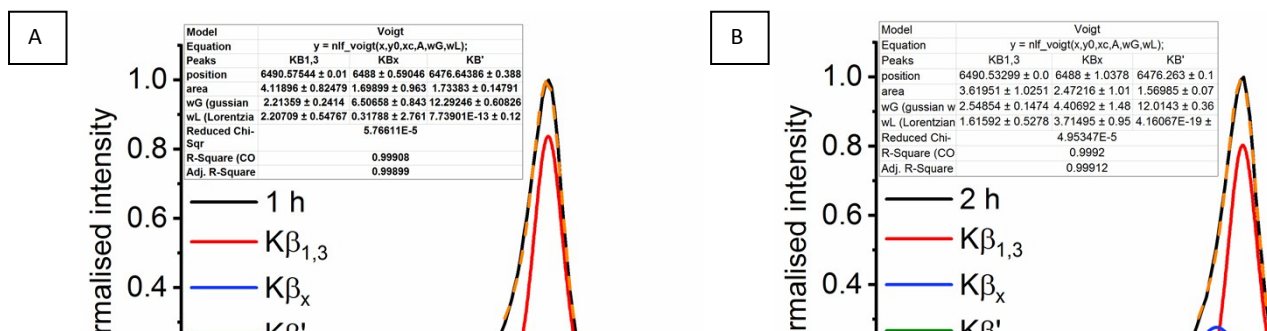

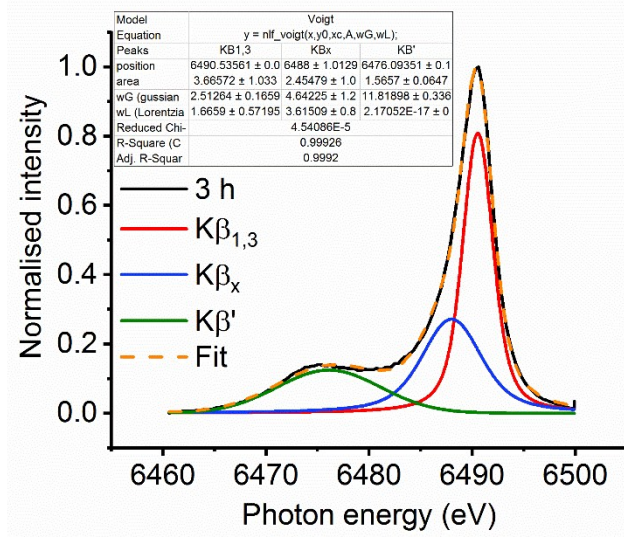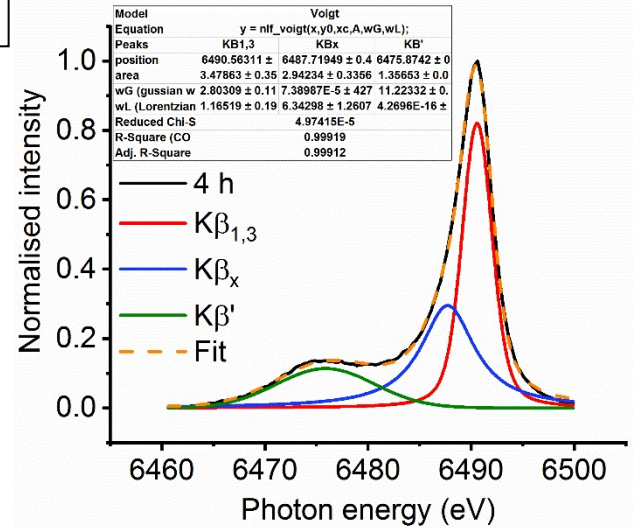

**Figure S2:** Mn K $\beta$  mainline fitted using three symmetric Voigt curves (K $\beta_{1,3}$ , K $\beta'$  and K $\beta_x$ ) during the mechanochemical synthesis of LaMnO<sub>3</sub> after (A) 1 h (B) 2 h (C) 3 h and (D) 4 h

**Table S1:** EXAFS fitting parameters for the Mn K-edge for spectra collected after 4 h of milling in air and inert (argon) conditions for the mechanochemical synthesis of LaMnO<sub>3</sub> compared to precursor Mn<sub>2</sub>O<sub>3</sub> and sol-gel synthesised LaMnO<sub>3</sub>. Fitting parameters:  $S_0^2 = 0.7$  determined by a Mn foil standard; Fit range  $3 < k < 11$ ,  $1.2 < R < 3.85$ . <sup>a</sup>CN fixed to known structures and the number of scattering paths reduced in order to minimise fitting parameters <sup>b</sup>All refined CN are within 10% error margin

| Sample                                       | Bond (Abs-Sc) | CN     | E0 (eV) | $\sigma^2$ | R / Å   |
|----------------------------------------------|---------------|--------|---------|------------|---------|
| <sup>a</sup> Mn <sub>2</sub> O <sub>3</sub>  | Mn-O1         | 4.0    | -5.7(2) | 0.007(1)   | 1.92(2) |
|                                              | Mn-O2         | 2.0    |         | 0.011(6)   | 2.27(3) |
|                                              | Mn-Mn1        | 6.0    |         | 0.0070(8)  | 3.10(2) |
|                                              | Mn-Mn2        | 6.0    |         | 0.012(3)   | 3.57(3) |
| <sup>b</sup> Air milled LaMnO <sub>3</sub>   | Mn-O          | 5.0(1) | -8.5(4) | 0.0054(3)  | 1.90(2) |
|                                              | Mn-La1        | 5.9(5) |         | 0.014(1)   | 3.24(1) |
|                                              | Mn-La2        | 2.0(1) |         | 0.0043(3)  | 3.37(1) |
| <sup>b</sup> Argon milled LaMnO <sub>3</sub> | Mn-O          | 4.9(1) | -9.6(2) | 0.0062(1)  | 1.90(1) |
|                                              | Mn-La2        | 6.0(1) |         | 0.010(1)   | 3.30(1) |
|                                              | Mn-La1        | 2.0(1) |         | 0.0050(1)  | 3.13(2) |
| <sup>a</sup> Sol-gel LaMnO <sub>3</sub>      | Mn-O          | 6.0    | -2.7(4) | 0.0058(5)  | 1.93(4) |
|                                              | Mn-La2        | 6.0    |         | 0.0071(6)  | 3.34(6) |
|                                              | Mn-La3        | 2.0    |         | 0.0020(9)  | 3.70(9) |

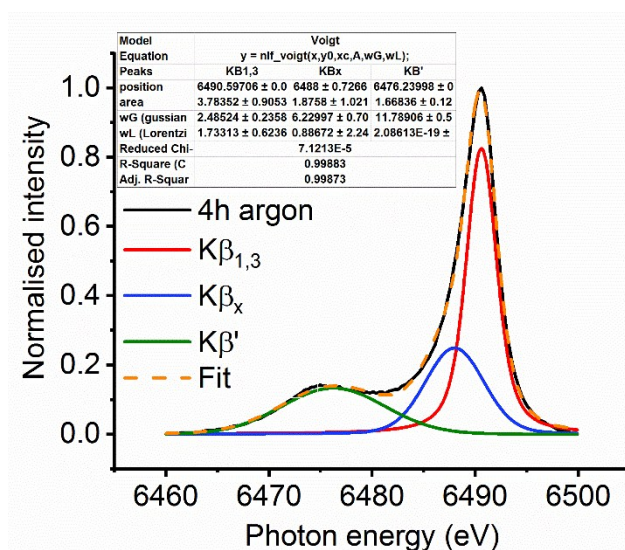

**Figure S3:** Mn K $\beta$  mainline fitted using three symmetric Voigt curves (K $\beta_{1,3}$ , K $\beta'$  and K $\beta_x$ ) for mechanochemically synthesised LaMnO<sub>3</sub> in an argon environment

**Table S2:** Surface Atomic percentage ratios of both 3 and 4 h milled LaMnO<sub>3</sub> compared to sol-gel synthesised sample

|         | Sol-gel | Air     | Argon   |
|---------|---------|---------|---------|
| La : Mn | 1.1 : 1 | 1.2 : 1 | 1.7 : 1 |
| O : La  | 1 : 0.2 | 1 : 0.2 | 1 : 0.2 |
| O : Mn  | 1 : 0.2 | 1 : 0.2 | 1 : 0.1 |

**Table S3:** Mn3s and La3d splitting energies for LaMnO<sub>3</sub> synthesised by sol-gel and mechanochemistry under different environments

|                     | Sol-gel | Air | Argon |
|---------------------|---------|-----|-------|
| Mn3s splitting (eV) | 4.8     | 4.9 | 5.0   |
| La3d splitting (eV) | 4.5     | 4.6 | 3.7   |



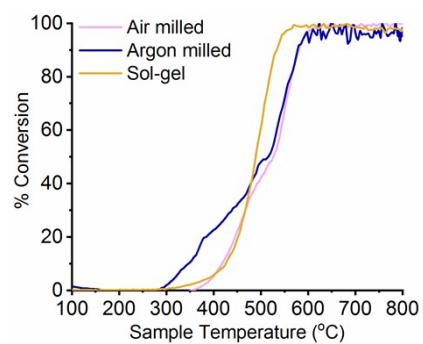

**Figure S4:** Repeat catalytic activity testing of deN<sub>2</sub>O for LaMnO<sub>3</sub> prepared by milling in air and argon compared to a sol-gel prepared perovskite

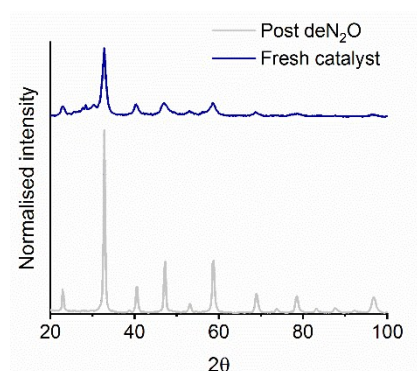

**Figure S5:** XRD patterns of LaMnO<sub>3</sub> mechanochemically synthesised in an argon atmosphere before and after deN<sub>2</sub>O

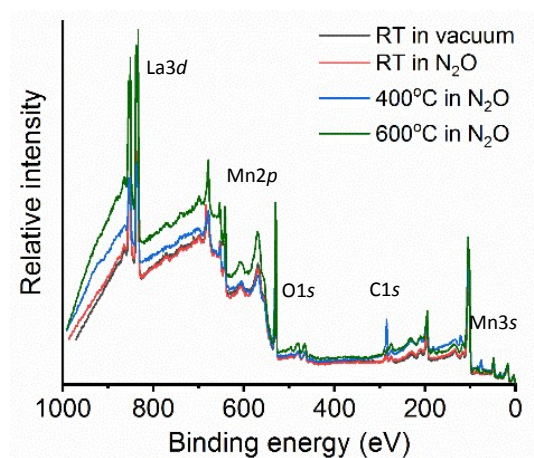

**Figure S6:** Survey scan at 1200 eV to calibrate correct binding energies for La3d, Mn3s, Mn2p and O1s for the argon milled catalyst at room temperature (RT) in vacuum, RT under a N<sub>2</sub>O atmosphere and after heating at 400°C and 600°C

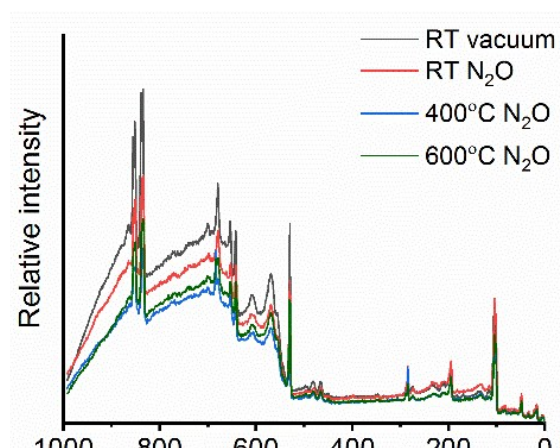

**Figure S7:** Survey scan at 1200 eV to calibrate correct binding energies for La3*d*, Mn3*s*, Mn2*p* and O1*s* for the air milled catalyst at room temperature (RT) in vacuum, RT under a N<sub>2</sub>O atmosphere and after heating at 400°C and 600°C

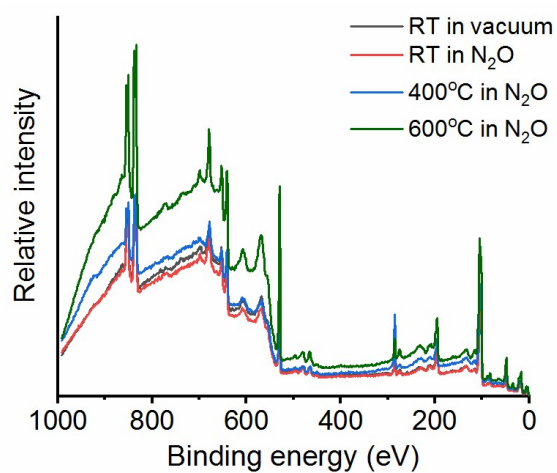

**Figure S8:** Survey scan at 1200 eV to calibrate correct binding energies for La3*d*, Mn3*s*, Mn2*p* and O1*s* for the sol-gel synthesised catalyst at room temperature (RT) in vacuum, RT under a N<sub>2</sub>O atmosphere and after heating at 400°C and 600°C

**Table S4:** NAP-XPS deconvoluted peak positions and areas during *in situ* deN<sub>2</sub>O of the air milled catalyst at Mn2p, Mn3s, La3d and O1s regions

|             |                                     | RT vacuum    | RT in N <sub>2</sub> O | 400 °C in N <sub>2</sub> O | 600 °C in N <sub>2</sub> O |
|-------------|-------------------------------------|--------------|------------------------|----------------------------|----------------------------|
| <b>Mn2p</b> | <b>Peak 1</b>                       | 641.6, 37671 | 641.8, 50225           | 641.3, 71126               | 641.5, 86067               |
|             | <b>Peak 2</b>                       | 643.7, 27363 | 644.3, 19745           | 643.2, 58775               | 653.5, 67777               |
|             | <b>Peak 3</b>                       | 653.2, 16135 | 653.6, 26975           | 652.9, 32281               | 653.2, 34134               |
|             | <b>Peak 4</b>                       | 655.2, 10737 | 656.3, 2412            | 655.0, 35168               | 654.8, 36277               |
|             | <b>Spin coupling</b>                | 11.7         | 11.9                   | 11.7                       | 11.8                       |
|             | <b>Ratio Mn(III):Mn(IV)</b>         | 1.4          | 2.5                    | 1.2                        | 1.3                        |
| <b>Mn3s</b> | <b>Peak 1</b>                       | 83.6         | 83.7                   | 83.3                       | 83.0                       |
|             | <b>Peak 2</b>                       | 88.6         | 88.7                   | 88.6                       | 88.3                       |
|             | <b>Satellite</b>                    | 92.0         | 91.9                   | 92.3                       | 92.3                       |
|             | <b>Splitting</b>                    | 5.0          | 5.1                    | 5.3                        | 5.3                        |
| <b>La3d</b> | <b>Peak 1</b>                       | 834.0        | 834.1                  | 834.95                     | 834.6                      |
|             | <b>Peak 2</b>                       | 838.2        | 838.1                  | 839.44                     | 839.22                     |
|             | <b>Peak 3</b>                       | 850.9        | 836.4                  | 837.23                     | 837.05                     |
|             | <b>Peak 4</b>                       | 855.0        | 851.0                  | 851.8                      | 851.5                      |
|             | <b>Peak 5</b>                       | 853.0        | 855.0                  | 856.29                     | 855.97                     |
|             | <b>Peak 6</b>                       | 836.2        | 853.4                  | 854.21                     | 853.91                     |
|             | <b>La3d<sub>5/2</sub> splitting</b> | 4.1          | 4.0                    | 4.5                        | 4.6                        |
|             | <b>Spin coupling</b>                | 16.8         | 16.9                   | 16.8                       | 16.9                       |
| <b>O1s</b>  | <b>Peak 1</b>                       | 529.2, 15913 | 529.2, 22031           | 529.4, 46689               | 530.2, 34509               |
|             | <b>Peak 2</b>                       | 531.1, 20980 | 531.0, 32303           | 531.4, 34064               | 531.3, 37535               |
|             | <b>Peak 3</b>                       | 533.3, 1540  | 533.1, 4718            | 533.9, 1349                | 533.4, 1516                |
|             | <b>Peak 4</b>                       | -            | -                      | -                          | -                          |

**Table S5:** NAP-XPS deconvoluted peak positions and areas during *in situ* deN<sub>2</sub>O of the sol-gel catalyst at Mn2p, Mn3s, La3d and O1s regions

|             |                                     | RT vacuum    | RT in N <sub>2</sub> O | 400 °C in N <sub>2</sub> O | 600 °C in N <sub>2</sub> O |
|-------------|-------------------------------------|--------------|------------------------|----------------------------|----------------------------|
| <b>Mn2p</b> | <b>Peak 1</b>                       | 641.6, 42127 | 641.4, 15869           | 641.3, 54139               | 641.3, 113016              |
|             | <b>Peak 2</b>                       | 643.7, 14016 | 643.5, 15941           | 643.5, 40711               | 643.6, 67138               |
|             | <b>Peak 3</b>                       | 653.3, 19832 | 653.4, 7762            | 653.1, 22587               | 653.0, 46964               |
|             | <b>Peak 4</b>                       | 655.2, 6549  | 655.5, 3353            | 654.9, 17644               | 655.2, 35191               |
|             | <b>Spin coupling</b>                | 11.7         | 12.0                   | 11.7                       | 11.8                       |
|             | <b>Ratio Mn(III):Mn(IV)</b>         | 3.0          | 1.0                    | 1.3                        | 1.7                        |
| <b>Mn3s</b> | <b>Peak 1</b>                       | -            | 83.33                  | 83.08                      | 83.11                      |
|             | <b>Peak 2</b>                       | -            | 88.47                  | 88.42                      | 88.57                      |
|             | <b>Satellite</b>                    | -            | -                      | -                          | -                          |
|             | <b>Splitting</b>                    | -            | 5.1                    | 5.3                        | 5.5                        |
| <b>La3d</b> | <b>Peak 1</b>                       | 833.94       | 833.89                 | 833.87                     | 834.1                      |
|             | <b>Peak 2</b>                       | 838.1        | 838.08                 | 838.19                     | 838.44                     |
|             | <b>Peak 3</b>                       | 836.14       | 836.05                 | 835.68                     | 835.94                     |
|             | <b>Peak 4</b>                       | 850.77       | 850.68                 | 850.73                     | 850.95                     |
|             | <b>Peak 5</b>                       | 854.96       | 854.8                  | 855.06                     | 855.27                     |
|             | <b>Peak 6</b>                       | 852.97       | 852.73                 | 852.6                      | 852.79                     |
|             | <b>La3d<sub>5/2</sub> splitting</b> | 4.2          | 4.2                    | 4.3                        | 4.3                        |
|             | <b>Spin coupling</b>                | 16.8         | 16.8                   | 16.9                       | 16.9                       |
| <b>O1s</b>  | <b>Peak 1</b>                       | 529.2, 10246 | 529.2, 6013            | 529.4, 30261               | 529.7, 66906               |
|             | <b>Peak 2</b>                       | 531.0, 12478 | 531.3, 7440            | 531.3, 23633               | 531.2, 52792               |
|             | <b>Peak 3</b>                       | 533.9, 1454  | 533.1, 2975            | 533.6, 3188                | 533.7, 1942                |
|             | <b>Peak 4</b>                       | -            | -                      | -                          | -                          |

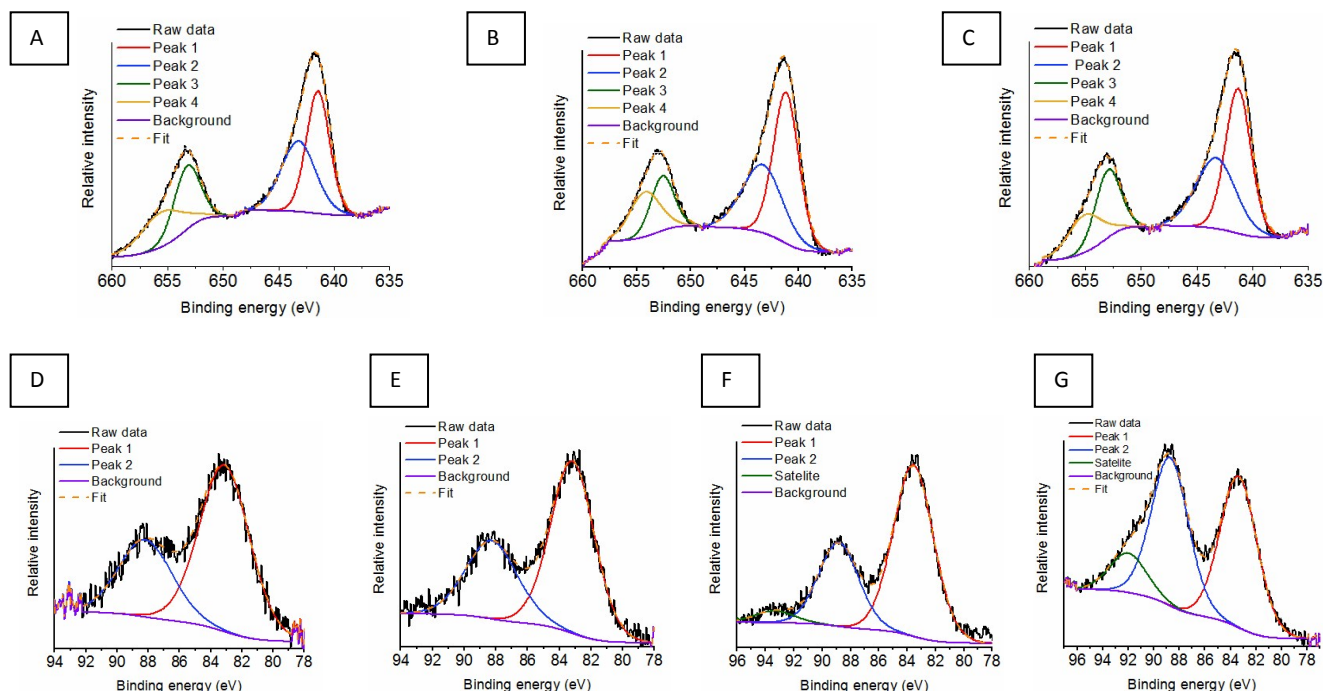

**Figure S9:** NAP-XPS performed on the argon milled catalyst at the Mn<sub>2p</sub> region at (A-C) RT under a N<sub>2</sub>O atmosphere and then heated to 400°C and 600°C and at the Mn<sub>3s</sub> region (D-G) at RT in vacuum, RT under a N<sub>2</sub>O atmosphere and then heated to 400°C and 600°C, respectively

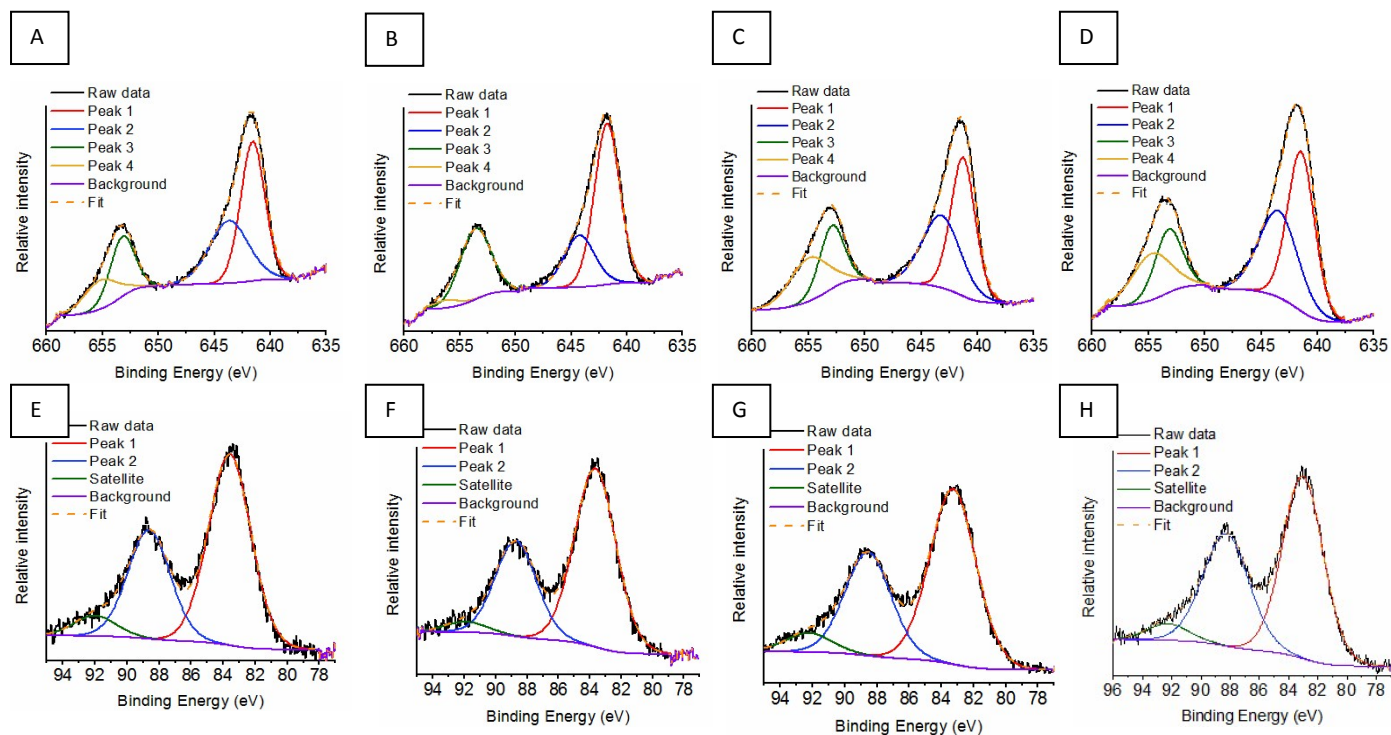

**Figure S10:** NAP-XPS performed on the air milled catalyst at the (A-D) Mn<sub>2p</sub> region and (E-H) Mn<sub>3s</sub> region at RT in vacuum, RT under a N<sub>2</sub>O atmosphere and then heated to 400°C and 600°C, respectively



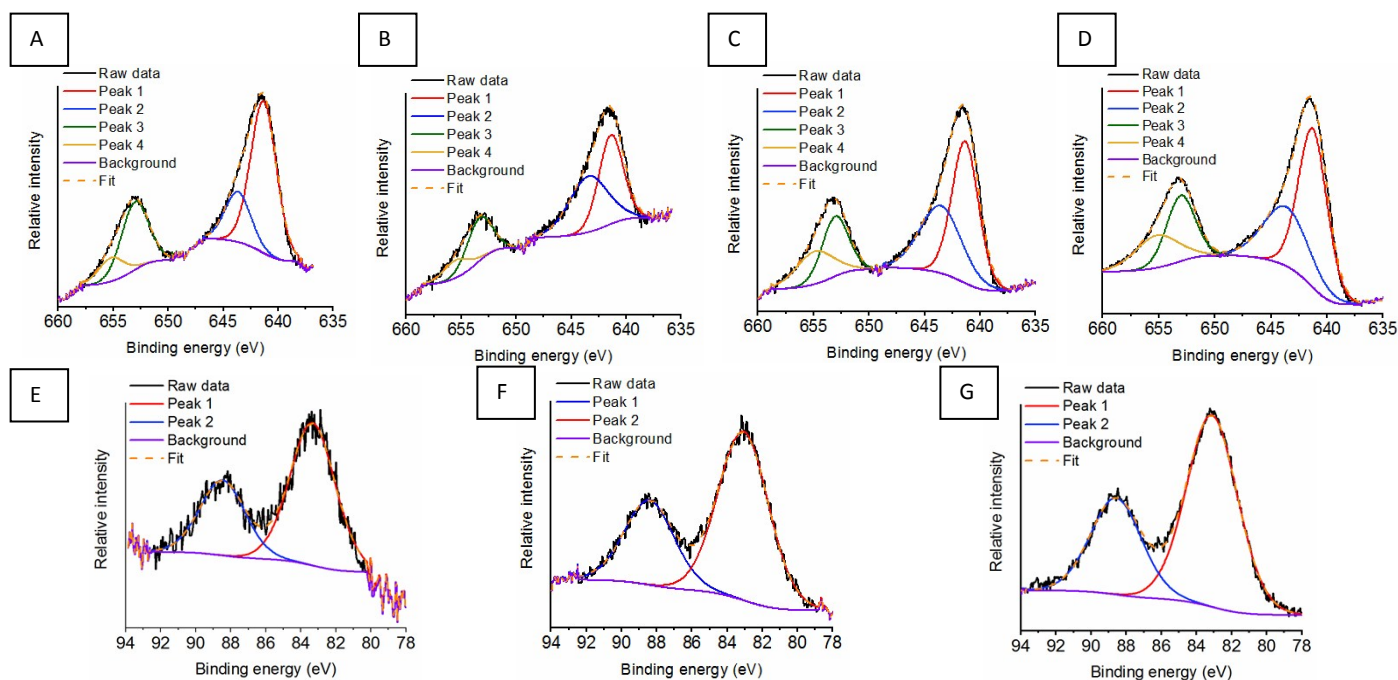

**Figure S11:** (A-D) Mn2p region RT in vacuum, RT under a N<sub>2</sub>O atmosphere and then heated to 400°C and 600°C and (E-G) Mn3s for the sol-gel synthesised catalyst at RT under a N<sub>2</sub>O atmosphere and then heated to 400°C and 600°C

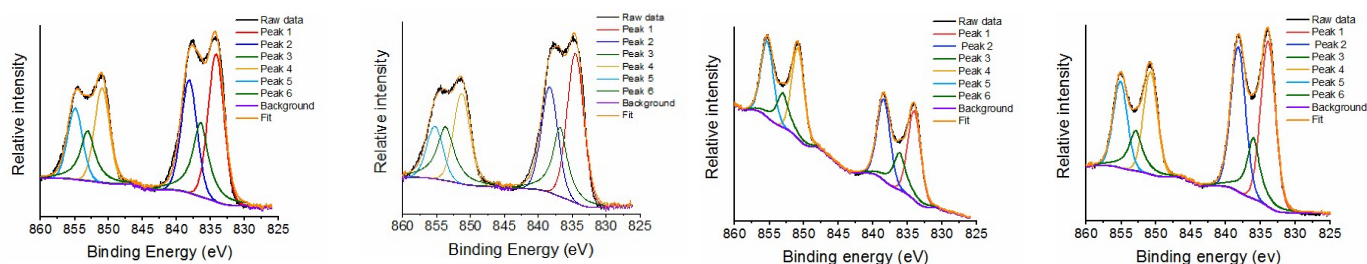

**Figure 12 (A-D)** La3d region for the argon milled catalyst at RT in vacuum, RT under a N<sub>2</sub>O atmosphere and then heated to 400°C and 600°C

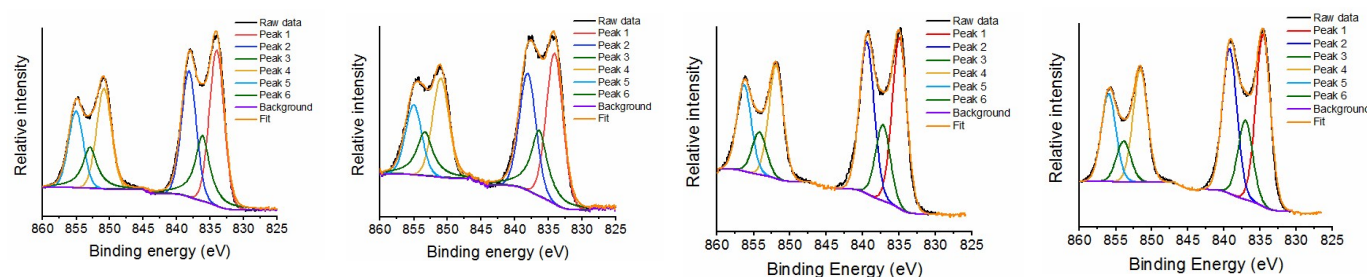

**Figure S13:** La3d region for the air milled catalyst at (A) RT in vacuum, (B) RT under a N<sub>2</sub>O atmosphere and then heated to (C) 400°C and (D) 600°C

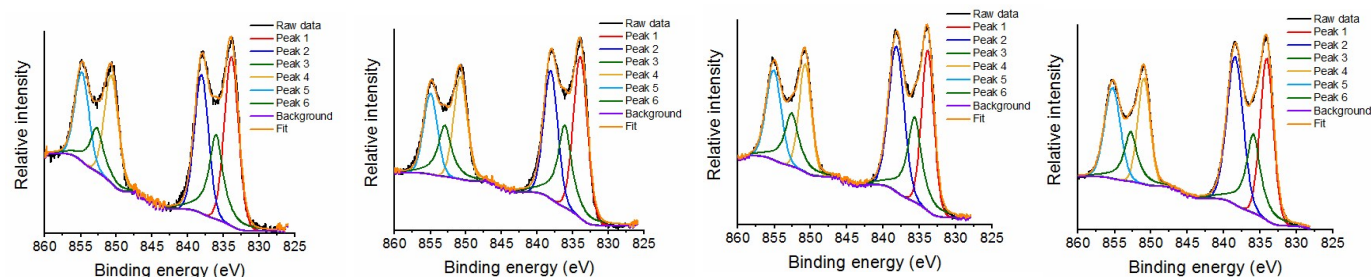



**Figure S14:** La3d region for the sol-gel synthesised catalyst at (A) RT in vacuum, (B) RT under a N<sub>2</sub>O atmosphere and then heated to (C) 400°C and (D) 600°C

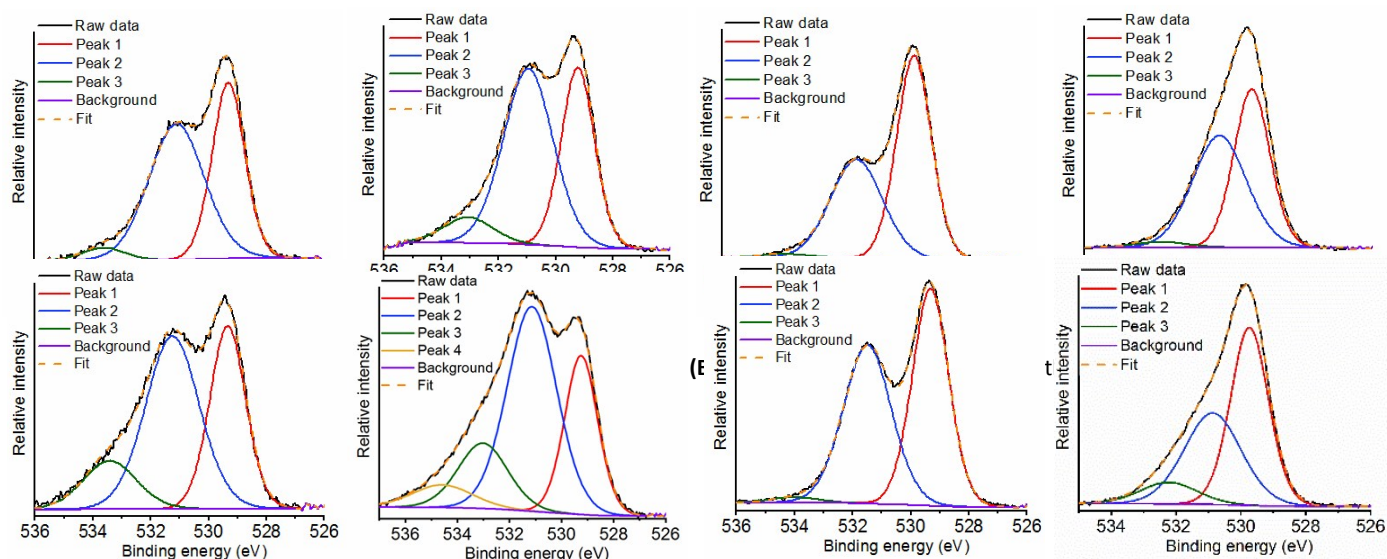

**Figure S15: (A-D)** O1s region for the argon milled catalyst at RT in vacuum, RT under a N<sub>2</sub>O atmosphere and then heated to 400°C and 600°C

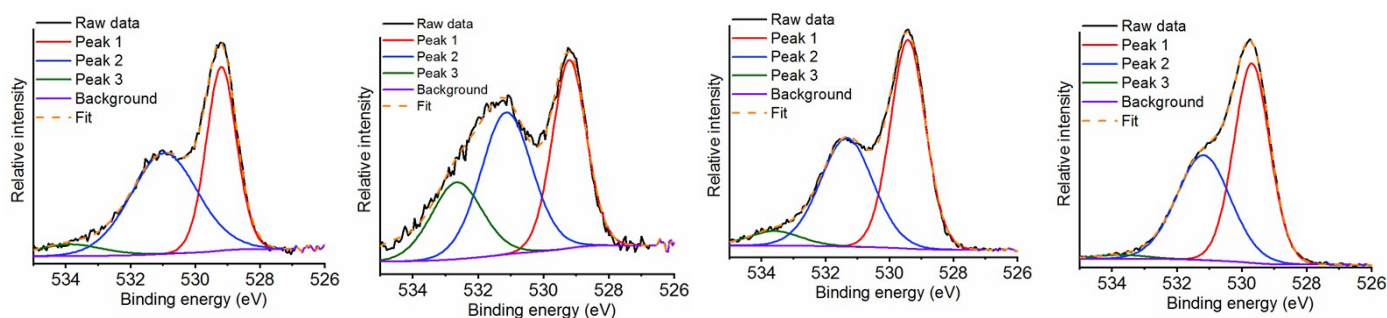

**Figure S17:** O1s region for the sol-gel synthesised catalyst at (A) RT in vacuum, (B) RT under a N<sub>2</sub>O atmosphere and then heated to (C) 400°C and (D) 600°C
